# Supplementary material
Source: PubMed Central journal article supplement (PMC10264970)
Supplement: NIHMS1897664-supplement-1.pdf [file NIHMS1897664-supplement-1.pdf]

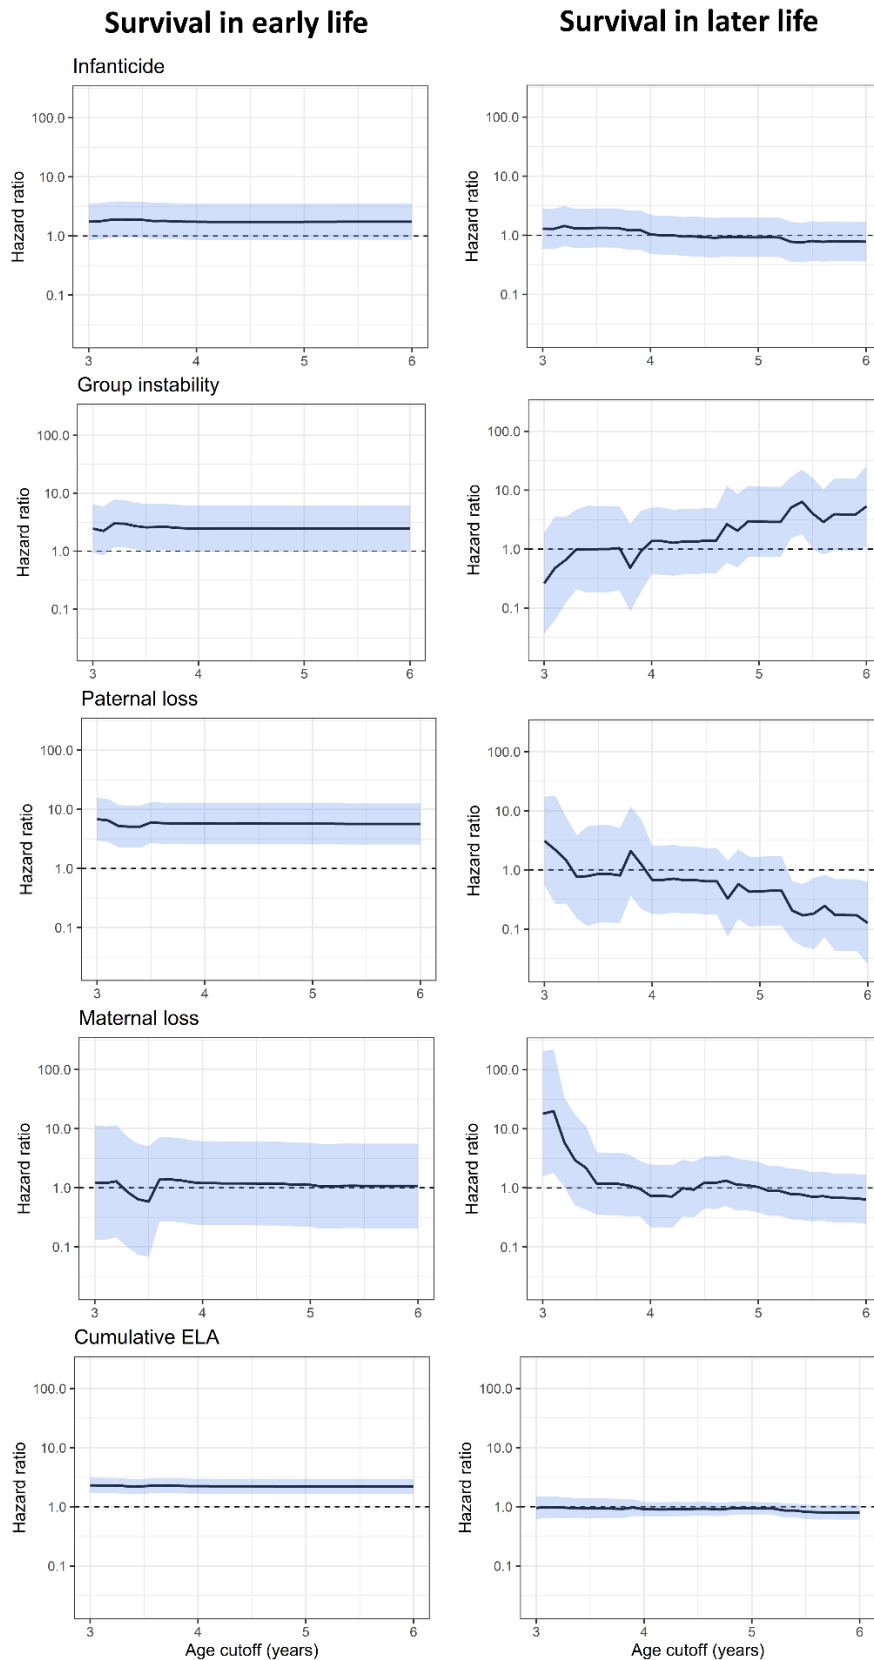

**Figure S1. The sensitivity of early life adversity survival effects to age of adverse experience, related to figures 1 and 2.** The sensitivity of the effects of early life adversity on survival in both early life (<6 years) and later life (≥6 years), shown in figures 1 and 2, to the age cut-off before which an adverse event must have been experienced in order for it to be classified as early life adversity. Confidence intervals overlapping one indicate no significant relationship between experiencing the adverse event and the risk of death. Values less than one indicate a reduced risk of dying and values greater than one indicate an increased risk of dying.

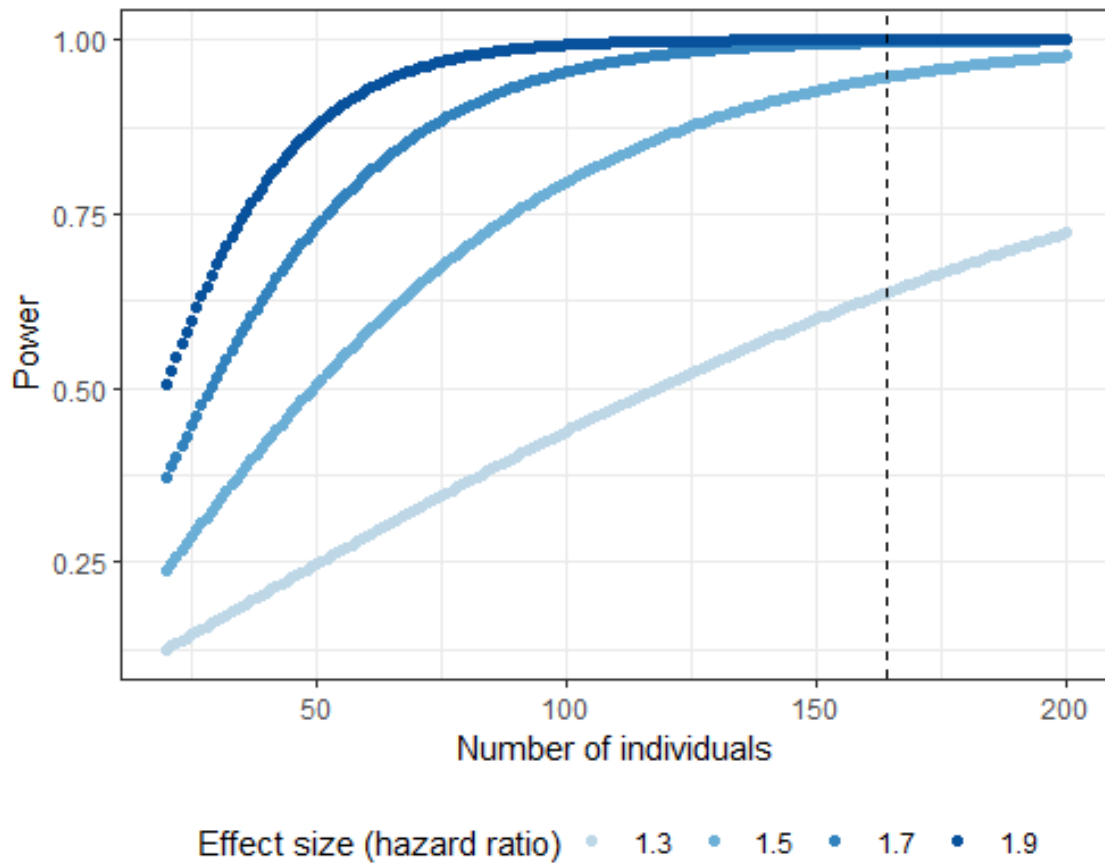

**Figure S2. Power analysis for the numeric early life adversity model, related to figure 2.** The power of our numeric cumulative early life adversity model to detect different effect sizes based on sample sizes between 20 and 200 individuals. Dashed line indicates  $n=164$ , the number of individuals included in our models. A hazard ratio of 1.9 is equivalent to that identified in similar analyses on baboons<sup>S1</sup>. The power analysis accounted for the proportion of censored individuals, the variance in cumulative number of early life adversities experienced, and the correlation between sex and cumulative early life adversity present in our data.

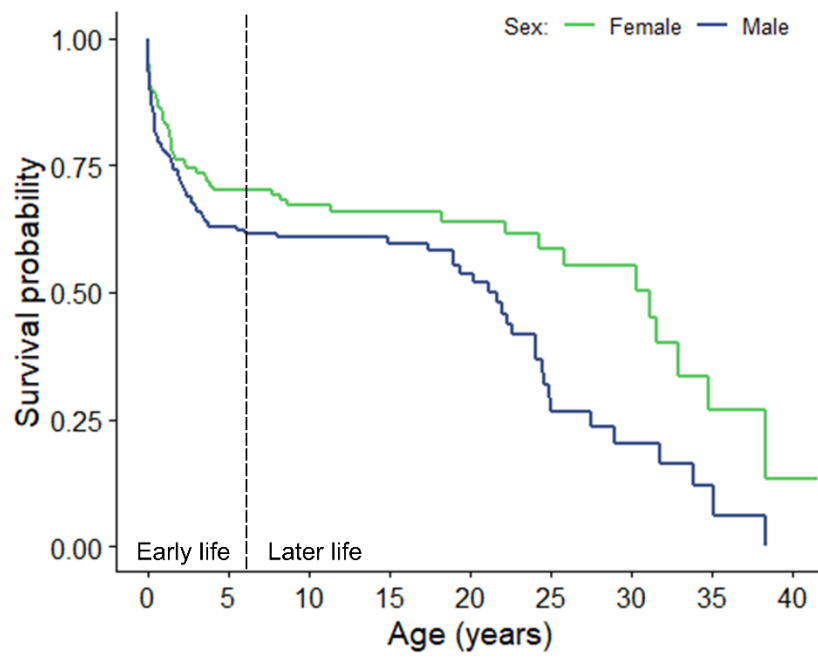

**Figure S3. Kaplan-Meier survival curves for male ( $n=135$ ) and female ( $n=118$ ) mountain gorillas, related to figure 3. Dashed line indicates cut-off between early life and later life (age six years, the point at which gorillas are classified as subadults).**

|                   | Competing sibling | Maternal loss | Paternal loss | Infanticide | Few age mates |
|-------------------|-------------------|---------------|---------------|-------------|---------------|
| Maternal loss     | -0.115            |               |               |             |               |
| Paternal loss     | -0.071            | 0.278         |               |             |               |
| Infanticide       | 0.028             | 0.172         | 0.035         |             |               |
| Few age mates     | 0.041             | 0.112         | 0.163         | 0.107       |               |
| Group instability | 0.077             | 0.170         | 0.585         | -0.092      | 0.168         |

| Kappa Value    | $X < 0.1$    | $0.1 \geq X > 0.2$ | $0.2 \geq X > 0.4$ | $0.4 \geq X > 0.6$ | $0.6 \geq X > 0.8$    | $0.8 \geq X > 1$       |
|----------------|--------------|--------------------|--------------------|--------------------|-----------------------|------------------------|
| Interpretation | no agreement | slight agreement   | fair agreement     | moderate agreement | substantial agreement | near-perfect agreement |

**Table S1. Agreement between putative source of early life adversity, related to table 1.** Cohen's Kappa scores for the agreement between the sources of early life adversity defined in Table 1. A score of 1 indicates complete agreement, i.e., that all individuals that suffered one source of adversity also suffered the other. A score of -1 indicates complete disagreement i.e., that none of the individuals that suffered one source of adversity also suffered the other.

**A. Mortality during early life (<6 years)**

| <b>A1 - Individual model</b>                             |                                               | concordance = 0.615 |          |
|----------------------------------------------------------|-----------------------------------------------|---------------------|----------|
|                                                          | <b>Hazard ratio (95% confidence interval)</b> | <b>Z</b>            | <b>P</b> |
| Maternal loss                                            | 1.173 (0.187 – 7.338)                         | 0.17                | 0.865    |
| Paternal loss                                            | 4.860 (2.083 – 11.342)                        | 3.66                | <0.001   |
| Group instability                                        | 2.461 (0.986 – 6.142)                         | 1.93                | 0.054    |
| Infanticide of a group member                            | 1.677 (0.768 – 3.665)                         | 1.30                | 0.195    |
| Competing sibling                                        | 0.420 (0.060 – 2.950)                         | -0.87               | 0.383    |
| Few age-mates                                            | 1.829 (1.159 – 2.887)                         | 2.60                | 0.009    |
| Sex (male)                                               | 1.246 (0.798 – 1.944)                         | 0.97                | 0.334    |
| <b>A2 - Cumulative model (ELA categories: 0, 1,2,3+)</b> |                                               | concordance = 0.610 |          |
|                                                          | <b>Hazard ratio (95% confidence interval)</b> | <b>Z</b>            | <b>P</b> |
| 1 ELA                                                    | 1.411 (0.823 – 2.419)                         | 1.25                | 0.210    |
| 2 ELAs                                                   | 3.105 (1.255 – 7.677)                         | 2.45                | 0.014    |
| 3+ ELAs                                                  | 26.590 (10.156 – 69.613)                      | 6.68                | <0.001   |
| Sex (male)                                               | 1.267 (0.801 – 2.003)                         | 1.01                | 0.310    |
| <b>A3 - Cumulative model (ELA numeric)</b>               |                                               | concordance = 0.610 |          |
|                                                          | <b>Hazard ratio (95% confidence interval)</b> | <b>Z</b>            | <b>P</b> |
| Number of ELAs                                           | 2.202 (1.649 – 2.940)                         | 5.35                | <0.001   |
| Sex (male)                                               | 1.252 (0.788 – 1.991)                         | 0.95                | 0.340    |

**B. Mortality in later life (>6 years)**

| <b>B1 - Individual model</b>                             |                                               | concordance = 0.656 |          |
|----------------------------------------------------------|-----------------------------------------------|---------------------|----------|
|                                                          | <b>Hazard ratio (95% confidence interval)</b> | <b>Z</b>            | <b>P</b> |
| Maternal loss                                            | 0.637 (0.358 – 2.067)                         | -0.93               | 0.350    |
| Paternal loss                                            | 0.126 (0.112 – 0.821)                         | -2.54               | 0.011    |
| Group instability                                        | 5.326 (0.782 – 4.672)                         | 2.07                | 0.039    |
| Infanticide                                              | 0.777 (0.300 – 1.478)                         | -0.64               | 0.520    |
| Competing sibling                                        | 0.342 (0.074 – 1.032)                         | -2.07               | 0.038    |
| Few age-mates                                            | 1.609 (0.256 – 2.254)                         | 0.83                | 0.410    |
| Sex (male)                                               | 2.571 (1.532 – 6.819)                         | 2.60                | 0.009    |
| <b>B2 - Cumulative model (ELA categories: 0, 1,2,3+)</b> |                                               | concordance = 0.599 |          |
|                                                          | <b>Hazard ratio (95% confidence interval)</b> | <b>Z</b>            | <b>P</b> |
| 1 ELA                                                    | 0.420 (0.175 – 1.012)                         | -1.93               | 0.053    |
| 2 ELAs                                                   | 0.675 (0.274 – 1.659)                         | -0.86               | 0.390    |
| 3+ ELAs                                                  | 0.305 (0.105 – 0.885)                         | -2.18               | 0.029    |
| Sex (male)                                               | 2.550 (1.264 – 5.144)                         | 2.61                | 0.009    |
| <b>B3 - Cumulative model (ELA numeric)</b>               |                                               | concordance = 0.593 |          |
|                                                          | <b>Hazard ratio (95% confidence interval)</b> | <b>Z</b>            | <b>P</b> |
| Number of ELAs                                           | 0.798 (0.605 – 1.054)                         | -1.59               | 0.110    |
| Sex (male)                                               | 2.725 (1.366 – 5.437)                         | 2.85                | 0.004    |

**Table S2. The effect of early life adversity on mortality, related to figures 1 and 2. Model output for cox proportional hazards models plotted in Figures 1 and 2, predicting mortality in A) early life (0-6 years) and B) later life (>6 years) based on early life adversities (ELAs) and sex.**

**A) Individual predictors**

| <b>Early life</b>                                          |                   | <b>Hazard ratio (95% CI)</b> | <b>Z</b> | <b>P</b> |
|------------------------------------------------------------|-------------------|------------------------------|----------|----------|
| Individual ELAs<br>(all six)                               | Maternal loss     | 1.173 (0.187 – 7.338)        | 0.170    | 0.865    |
|                                                            | Paternal loss     | 4.860 (2.083 – 11.342)       | 3.657    | <0.001*  |
|                                                            | Group instability | 2.461 (0.986 – 6.142)        | 1.931    | 0.054    |
|                                                            | Infanticide       | 1.677 (0.768 – 3.665)        | 1.297    | 0.195    |
|                                                            | Competing sibling | 0.420 (0.060 – 2.950)        | -0.872   | 0.383    |
|                                                            | Few age-mates     | 1.829 (1.159 – 2.887)        | 2.596    | 0.009*   |
| Individual ELAs<br>(no paternal loss)                      | Maternal loss     | 1.323 (0.243 – 7.194)        | 0.324    | 0.746    |
|                                                            | Group instability | 4.593 (1.820 – 11.593)       | 3.228    | 0.001*   |
|                                                            | Infanticide       | 1.958 (0.856 – 4.479)        | 1.591    | 0.112    |
|                                                            | Competing sibling | 0.361 (0.053 – 2.439)        | -1.045   | 0.296    |
|                                                            | Few age-mates     | 1.781 (1.114 – 2.848)        | 2.410    | 0.016*   |
|                                                            |                   |                              |          |          |
| Individual ELAs<br>(no competing sibling)                  | Maternal loss     | 1.254 (0.198 – 7.931)        | 0.240    | 0.810    |
|                                                            | Paternal loss     | 4.972 (2.129 – 11.612)       | 3.706    | <0.001*  |
|                                                            | Group instability | 2.447 (0.986 – 6.073)        | 1.930    | 0.054    |
|                                                            | Infanticide       | 1.651 (0.760 – 3.587)        | 1.267    | 0.205    |
|                                                            | Few age-mates     | 1.802 (1.142 – 2.843)        | 2.529    | 0.011*   |
|                                                            |                   |                              |          |          |
| Individual ELAs<br>(no paternal loss or competing sibling) | Maternal loss     | 1.440 (0.267 – 7.761)        | 0.424    | 0.672    |
|                                                            | Group instability | 4.604 (1.848 – 11.472)       | 3.278    | 0.001    |
|                                                            | Infanticide       | 1.926 (0.853 – 4.352)        | 1.577    | 0.115    |
|                                                            | Few age-mates     | 1.761 (1.103 – 2.812)        | 2.371    | 0.018*   |
|                                                            |                   |                              |          |          |
| <b>Later life</b>                                          |                   | <b>Hazard ratio (95% CI)</b> | <b>Z</b> | <b>P</b> |
| Individual ELAs<br>(all six)                               | Maternal loss     | 0.637 (0.358 – 2.067)        | -0.93    | 0.350    |
|                                                            | Paternal loss     | 0.126 (0.112 – 0.821)        | -2.54    | 0.011*   |
|                                                            | Group instability | 5.326 (0.782 – 4.672)        | 2.07     | 0.039*   |
|                                                            | Infanticide       | 0.777 (0.300 – 1.478)        | -0.64    | 0.520    |
|                                                            | Competing sibling | 0.342 (0.074 – 1.032)        | -2.07    | 0.038*   |
|                                                            | Few age-mates     | 1.609 (0.256 – 2.254)        | 0.83     | 0.410    |
| Individual ELAs<br>(no paternal loss)                      | Maternal loss     | 0.637 (0.242 – 1.676)        | -0.91    | 0.360    |
|                                                            | Group instability | 0.848 (0.379 – 1.895)        | -0.40    | 0.690    |
|                                                            | Infanticide       | 0.844 (0.390 – 1.831)        | -0.43    | 0.670    |
|                                                            | Competing sibling | 0.516 (0.207 – 1.285)        | -1.42    | 0.160    |
|                                                            | Few age-mates     | 1.241 (0.388 – 3.968)        | 0.36     | 0.720    |
|                                                            |                   |                              |          |          |
| Individual ELAs<br>(no competing sibling)                  | Maternal loss     | 0.855 (0.356 – 2.056)        | -0.35    | 0.730    |
|                                                            | Paternal loss     | 0.194 (0.043 – 0.886)        | -2.12    | 0.034*   |
|                                                            | Group instability | 3.545 (0.769 – 16.352)       | 1.62     | 0.100    |
|                                                            | Infanticide       | 0.874 (0.410 – 1.864)        | -0.35    | 0.730    |
|                                                            | Few age-mates     | 1.272 (0.435 – 3.717)        | 0.44     | 0.660    |
|                                                            |                   |                              |          |          |
| Individual ELAs<br>(no paternal loss or competing sibling) | Maternal loss     | 0.751 (0.356 – 2.056)        | -0.61    | 0.540    |
|                                                            | Group instability | 0.827 (0.769 – 16.352)       | -0.47    | 0.640    |
|                                                            | Infanticide       | 0.876 (0.410 – 1.864)        | -0.33    | 0.740    |
|                                                            | Few age-mates     | 1.107 (0.435 – 3.717)        | 0.18     | 0.860    |

### B) Cumulative categorical

| Early life                                                                 |    | Hazard ratio (95% CI)    | Z     | P       |
|----------------------------------------------------------------------------|----|--------------------------|-------|---------|
| Cumulative number of ELAs<br>(all six)                                     | 1  | 1.411 (0.823 – 2.419)    | 1.25  | 0.210   |
|                                                                            | 2  | 3.105 (1.255 – 7.677)    | 2.45  | 0.014*  |
|                                                                            | 3+ | 26.590 (10.156 – 69.613) | 6.68  | <0.001* |
| Cumulative number of ELAs<br>(Five; no paternal loss)                      | 1  | 1.530 (0.909 – 2.575)    | 1.60  | 0.110   |
|                                                                            | 2  | 4.815 (2.163 – 10.720)   | 3.85  | 0.001*  |
|                                                                            | 3+ | 8.664 (1.697 – 44.229)   | 2.60  | 0.009*  |
| Cumulative number of ELAs<br>(Five; no competing sibling)                  | 1  | 1.329 (0.768 – 2.300)    | 1.02  | 0.310   |
|                                                                            | 2  | 3.707 (1.485 – 9.259)    | 2.81  | 0.005*  |
|                                                                            | 3+ | 32.952 (12.630 – 75.885) | 7.14  | <0.001* |
| Cumulative number of ELAs<br>(Four; no paternal loss or competing sibling) | 1  | 1.476 (0.875 – 2.489)    | 1.46  | 0.140   |
|                                                                            | 2  | 6.039 (2.706– 13.481)    | 4.39  | <0.001* |
|                                                                            | 3+ | 14.747(2.866– 85.977)    | 3.22  | 0.001*  |
| Later life                                                                 |    | Hazard ratio (95% CI)    | Z     | P       |
| Cumulative number of ELAs<br>(all six)                                     | 1  | 0.420 (0.175, 1.012)     | -1.93 | 0.053   |
|                                                                            | 2  | 0.675 (0.274, 1.659)     | -0.86 | 0.390   |
|                                                                            | 3+ | 0.305 (0.105, 0.885)     | -2.18 | 0.029*  |
| Cumulative number of ELAs<br>(Five; no paternal loss)                      | 1  | 0.658 (0.313, 1.382)     | -1.10 | 0.270   |
|                                                                            | 2  | 0.592 (0.167, 2.103)     | -0.81 | 0.420   |
|                                                                            | 3+ | 0.512 (0.184, 1.426)     | -1.28 | 0.200   |
| Cumulative number of ELAs<br>(Five; no competing sibling)                  | 1  | 0.890 (0.403, 1.966)     | -0.29 | 0.770   |
|                                                                            | 2  | 0.879 (0.388, 1.991)     | -0.31 | 0.760   |
|                                                                            | 3+ | 0.428 (0.141, 1.302)     | -1.50 | 0.130   |
| Cumulative number of ELAs<br>(Four; no paternal loss or competing sibling) | 1  | 1.030 (0.504, 2.104)     | 0.08  | 0.940   |
|                                                                            | 2  | 0.660 (0.217, 2.012)     | -0.73 | 0.470   |
|                                                                            | 3+ | 0.747 (0.239, 2.333)     | -0.50 | 0.620   |

### C) Cumulative numeric

| Early life                                                                 | Hazard ratio (95% CI)                  | Z     | P       |
|----------------------------------------------------------------------------|----------------------------------------|-------|---------|
| Cumulative number of ELAs<br>(all six)                                     | 2.202 (1.649,2.940)                    | 5.35  | P<0.001 |
| Cumulative number of ELAs<br>(Five; no paternal loss)                      | 1.924 (1.383, 2.679)                   | 3.88  | P<0.001 |
| Cumulative number of ELAs<br>(Five; no competing sibling)                  | 2.344 (1.751, 3.138)                   | 5.72  | P<0.001 |
| Cumulative number of ELAs<br>(Four; no paternal loss or competing sibling) | 2.112 (1.504, 2.964)                   | 4.32  | P<0.001 |
| Later life                                                                 | Hazard ratio (95% confidence interval) | Z     | P       |
| Cumulative number of ELAs<br>(all six)                                     | 0.798 (0.605, 1.054)                   | -1.59 | 0.110   |
| Cumulative number of ELAs<br>(Five; no paternal loss)                      | 0.819 (0.591, 1.135)                   | -1.20 | 0.230   |
| Cumulative number of ELAs<br>(Five; no competing sibling)                  | 0.848 (0.649, 1.107)                   | -1.21 | 0.220   |
| Cumulative number of ELAs<br>(Four; no paternal loss or competing sibling) | 0.882 (0.637, 1.224)                   | -0.75 | 0.450   |

**Table S3. Robustness of the effects of early life adversity on mortality, related to figures 1 and 2.** The robustness of the survival model predictions shown in figures 1 and 2, to the exclusion of correlated forms of adversity (paternal loss, which overlaps with both maternal loss and group instability; see Supp. Table 1 and main text) as well as one linked with potential fitness benefits (competing younger sibling, which may be indicative of a particularly high-quality or healthy mother, faster development, and/or more social support from relatives). Model output for individual predictors, cumulative categorical and cumulative numeric cox proportional hazards models predicting mortality in early life (0-6 years) and later life (>6 years), when all ELAs are included, when paternal loss is excluded, when competing sibling is excluded, and when both paternal loss and competing sibling are excluded. Predictors in red indicate adversities whose effects are not robust to the exclusion of some other predictors, i.e. that gain or lose significance when either paternal loss, competing sibling or both are not considered forms of adversity. \*indicates significant p-values.

**Supplemental Reference**

- S1. Tung, J., Archie, E.A., Altmann, J., and Alberts, S.C. (2016). Cumulative early life adversity predicts longevity in wild baboons. *Nat. Commun.* 10.1038/ncomms11181.
